# Supplementary material
Source: Springer Nature journal article supplement (https://www.springermedizin.de/resource/supplementary/12985_2010_1092_MOESM1_ESM.pdf/9609122)

**A**

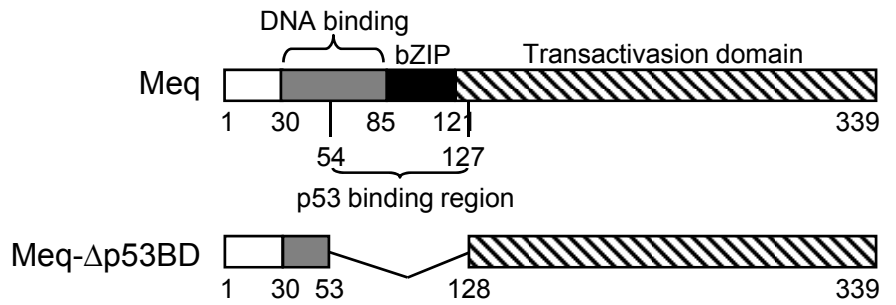

**B**

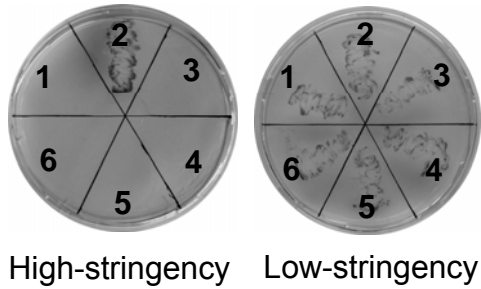

- 1, pGBKT7-Meq + pGADT7 vector
- 2, pGBKT7-Meq + pGADT7-p53
- 3, pGBKT7-Meq- $\Delta$ p53BD + pGADT7 vector
- 4, pGBKT7-Meq- $\Delta$ p53BD + pGADT7-p53
- 5, pGBKT7 vector + pGADT7-p53
- 6, pGBKT7 vector + pGADT7 vector

**C**

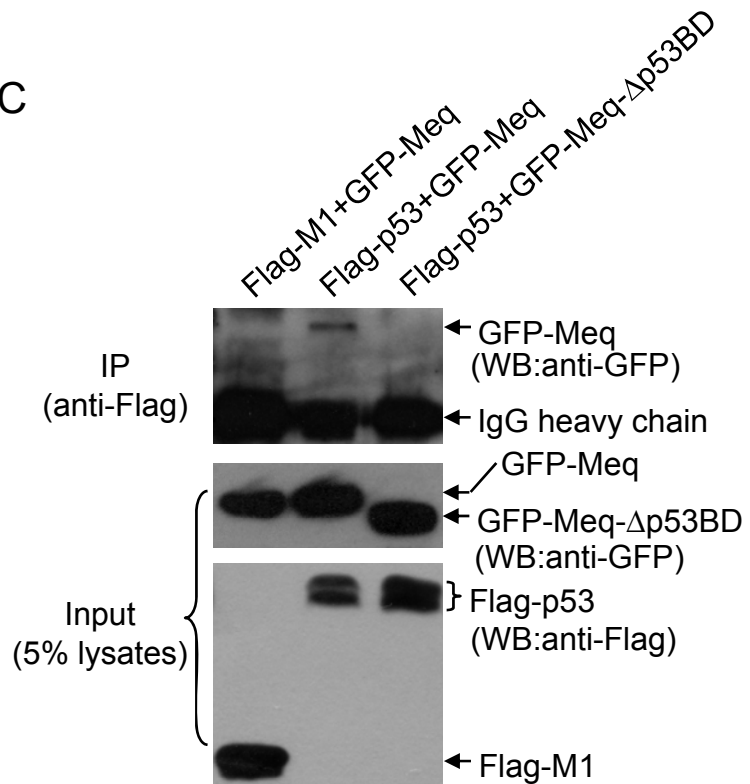

**D**

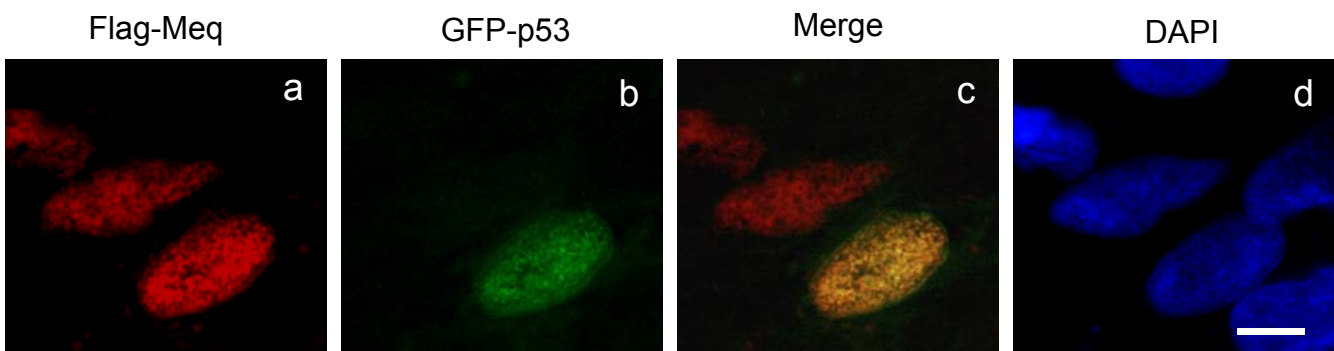

Supplement: MOESM1 [file 9609122]
